# Supplementary material for: Co-substitution in a Prussian blue analog with a hollow heterostructure for ultrahigh capacity and rate capability aqueous Zn2+ batteries
Source: Royal Society of Chemistry journal article supplement (doi:10.1039/d2cc02974j), 2022-01-01
Supplement: d2cc02974j1.pdf [file d2cc02974j1.pdf]

## Supporting information

### Co-substitution of Prussian blue analogue with hollow heterostructures for ultrahigh capacity and rate capability aqueous Zn<sup>2+</sup> batteries

Zhihao Su<sup>a</sup>, Jionghao Huang<sup>a</sup>, Runhao Wang<sup>a</sup>, Yufei Zhang<sup>b\*</sup>, Zili Liu<sup>a</sup> and Haosen Fan<sup>a\*</sup>

<sup>a</sup>*School of Chemistry and Chemical Engineering, Guangzhou University, Guangzhou 510006, China*

<sup>b</sup>*School of Chemical Engineering and Light Industry, Guangdong University of Technology, Guangzhou 510006, China*

E-mail: [hsfan@gzhu.edu.cn](mailto:hsfan@gzhu.edu.cn); [yfzhang@gdut.edu.cn](mailto:yfzhang@gdut.edu.cn)

#### Experimental Section

##### 1. Synthesis of H-PBMN

Firstly, 0.396 g MnCl<sub>2</sub>·4H<sub>2</sub>O, 4.83 g of potassium citrate and 3.0 g of PVP (K30) were added and dissolved into 50 mL deionized water to form A solution. Then, 0.422 g K<sub>4</sub>Fe(CN)<sub>6</sub>·3H<sub>2</sub>O was dissolved in 50 mL of deionized water to form B solution, which was then dropwise added into the A solution at a rate of 2.0 mL/min under vigorous stirring to form mixed solution. Secondly, 50 mL of 0.02 M K<sub>2</sub>Ni(CN)<sub>4</sub> solution and the 50 mL of 0.02 M MnCl<sub>2</sub> aqueous solution with 1.0 g PVP and 1.61 g of potassium citrate were dropwise added to the mixed solution at the same dropping rate (2.0 mL/min) under vigorous stirring. The mixture was kept stirring for 6 h at room temperature and then aged for another 24 h. The H-PBMN precipitates were collected by centrifugation after washing with deionized water and ethanol several times, and then dried under vacuum at 60 °C overnight. The synthesis methods for contrast sample H-PBM were similar to that of the H-PBMN, but replaced 0.02 M K<sub>2</sub>Ni(CN)<sub>4</sub> solution with 0.02 M K<sub>4</sub>Fe(CN)<sub>6</sub>·3H<sub>2</sub>O solution.

##### 2. Materials characterization

The crystallographic structures of the H-PBMN and electrodes after cycles were analyzed by X-ray diffractometer (XRD) using a Malvern Panalytical PW3040/60 with

a Cu K $\alpha$  radiation source. The element valence states were analyzed by X-ray photoelectron spectroscopy (XPS, Thermo Scientific K-Alpha, USA). The morphology, structure, and size of the samples were investigated by the scanning electron microscopy (SEM, JSM-7001F) and the transmission electron microscopy (TEM, JEOL, JEM-2100F) equipped with Energy dispersive X-ray spectroscopy (EDX). The Brunauer Emmett Teller (BET) surface area and the pore size distribution of the samples was obtained by N<sub>2</sub> adsorption-desorption analysis.

### 3. Electrochemical measurements

The H-PBMN electrode was prepared by casting on a carbon fiber paper a slurry, in which the H-PBMN active material, ketjen black, and polyvinylidene fluoride (PVDF) binder with a weight ratio of 7:2:1 were mixed by N-Methyl-2-pyrrolidone (NMP). Subsequently, the coated fiber paper was dried in a vacuum oven at 60 °C for 12 h. The electrochemical characterizations of H-PBMN were conducted in the CR2032 coin cells consisting of 0.03 mm Zn foils as the anode, Whatman GF/A glass fiber filter as the separator, and the 3 M Zn(CF<sub>3</sub>SO<sub>3</sub>)<sub>2</sub> electrolyte. The Cyclic voltammogram (CV) was performed on an IVIUMnSTAT multichannel electrochemical analyzer (N66728) in the voltage range of 0.4-1.85 V. The electrochemical impedance spectroscopy (EIS) (10 mHz-100 kHz, 5 mV) was performed on electrochemical working station (CHI660E). The charge/discharge tests and Galvanostatic intermittence titration technique (GITT) were measured by using the Neware CT-4008 test system in a potential range of 0.4-1.85 V.

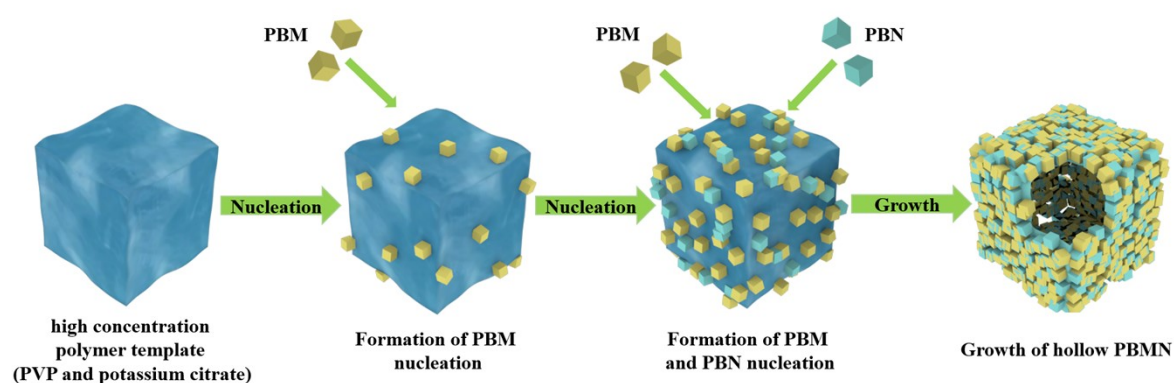

**Fig. S1.** Schematic diagram of the synthetic process of H-PBMN.

**Table S1.** Comparison of the cycle performance of the H-PBMN cathode materials in aqueous Zn ion batteries

| Electrodes   | Capacity<br>mAh g <sup>-1</sup> @A g <sup>-1</sup> | Cycling<br>Performance           | Ref.      |
|--------------|----------------------------------------------------|----------------------------------|-----------|
| H-PBMN       | 71.9@0.5                                           | 77.9% retained after 400 cycles  | This work |
| KMHCF-PVP-80 | 140@0.1                                            | 60.7% retained after 400 cycles  | 1         |
| MZHCF-7      | 41.6@0.05                                          | 94% retained after 500 cycles    | 2         |
| CoMn-PBA     | - @1.0                                             | 74.6% retained after 1000 cycles | 3         |
| ZnHCF        | 50.6@0.5                                           | 71% retained after 1000 cycles   | 4         |
| Mn-PBA       | - @1.0                                             | 53.6% retained after 1000 cycles | 3         |

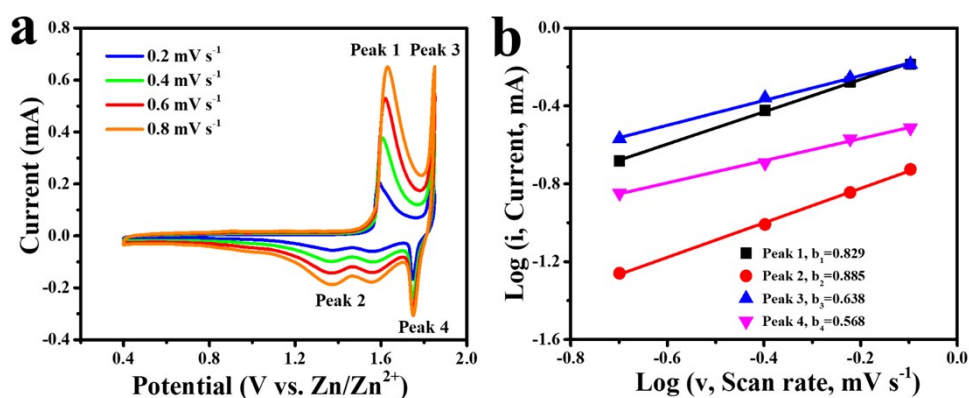

**Fig. S2.** (a) CV curves of the H-PBMN cathode at different scan rate of 0.2-0.8 mV s<sup>-1</sup>. (b) log (i, Current) versus log (v, Scan rate) plots at specific peak currents.

#### References:

1. T. Cao, F. Zhang, M. Chen, T. Shao, Z. Li, Q. Xu, D. Cheng, H. Liu and Y. Xia, *ACS Appl. Mater. Interfaces*, 2021, **13**, 26924-26935.
2. G. Ni, X. Xu, Z. Hao, W. Wang, C. Li, Y. Yang, C. Zhou, L. Qin, W. Chen, X. Yao and J. Cai,

*ACS Appl. Energy Mater.*, 2021, **4**, 602-610.

3. Y. Zeng, X. Lu, S. Zhang, D. Luan, S. Li, X.-W. Lou, *Angew. Chem. Int. Ed. Engl.*, 2021, **60**, 22189-22194.

4. K. Lu, B. Song, Y. Zhang, H. Ma and J. Zhang, *J. Mater. Chem. A*, 2017, **5**, 23628-23633.
